# Supplementary material for: ZIF-8 encapsulation improves the antifungal activity of benzaldehyde and methyl anthranilate in films
Source: Royal Society of Chemistry journal article supplement (doi:10.1039/d3dt03229a), 2023-01-01
Supplement: d3dt03229a1.pdf [file d3dt03229a1.pdf]

## ZIF-8 encapsulation improves the antifungal activity of benzaldehyde and methyl anthranilate in biopolymeric films

*Katia Caamaño,<sup>a</sup> Gracia López-Carballo,<sup>b</sup> Raquel Heras-Mozos,<sup>b</sup> Jana Glatz,<sup>a</sup> Pilar Hernández-Muñoz,<sup>b</sup> Rafael Gavara<sup>b</sup> and Mónica Giménez-Marqués<sup>\*a</sup>*

### Supporting Information

|                                                       |   |
|-------------------------------------------------------|---|
| ZIF-8 NPs characterization .....                      | 2 |
| <b>Dynamic Light Scattering measurements</b> .....    | 2 |
| Preparation of biomolecule@ZIF-8 composites.....      | 3 |
| <b>HPLC Calibration curves</b> .....                  | 3 |
| <b>Encapsulation kinetics</b> .....                   | 3 |
| Characterization of biomolecule@ZIF-8 composites..... | 4 |
| <b>Infrared Spectroscopy</b> .....                    | 4 |
| <b>N<sub>2</sub> sorption isotherms at 77 K</b> ..... | 7 |
| Bz release kinetics .....                             | 8 |

## ZIF-8 NPs characterization

### Dynamic Light Scattering measurements

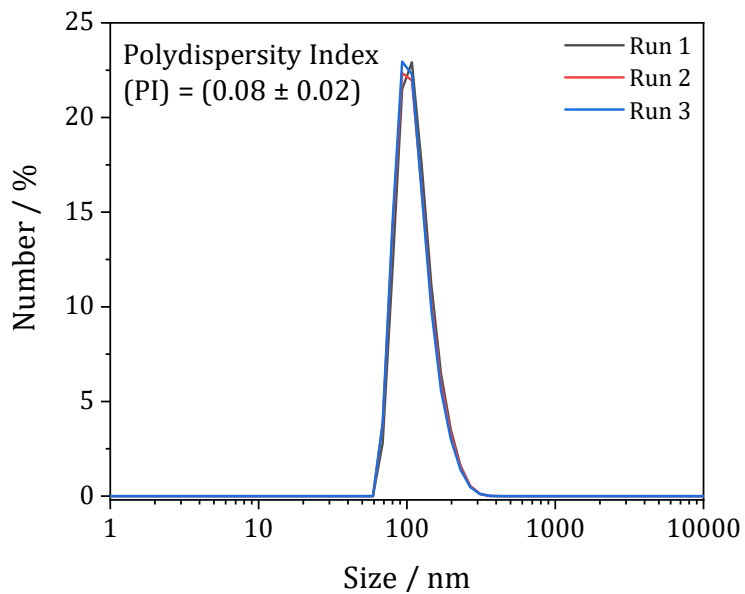

**Figure S1:** Hydrodynamic size of the pristine ZIF-8 nanoparticles in a methanol suspension.

# Preparation of biomolecule@ZIF-8 composites

## HPLC Calibration curves

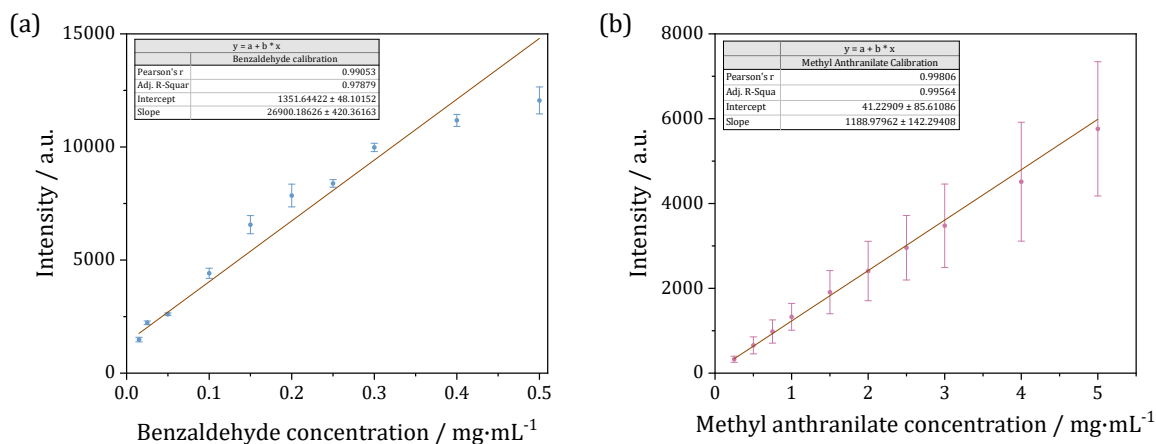

**Figure S2.** Calibration curves in acetonitrile of benzaldehyde (a) and methyl anthranilate (b). Statistics table is included in each graph.

## Encapsulation kinetics

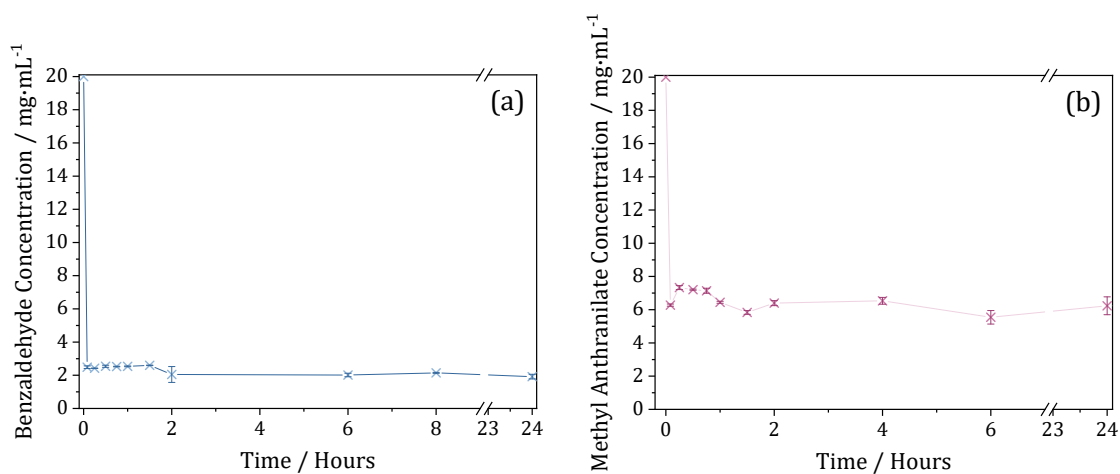

**Figure S3.** Benzaldehyde (a) and methyl anthranilate (b) concentration remanent in the encapsulation media after different encapsulation times quantified by means of HPLC

## Characterization of biomolecule@ZIF-8 composites

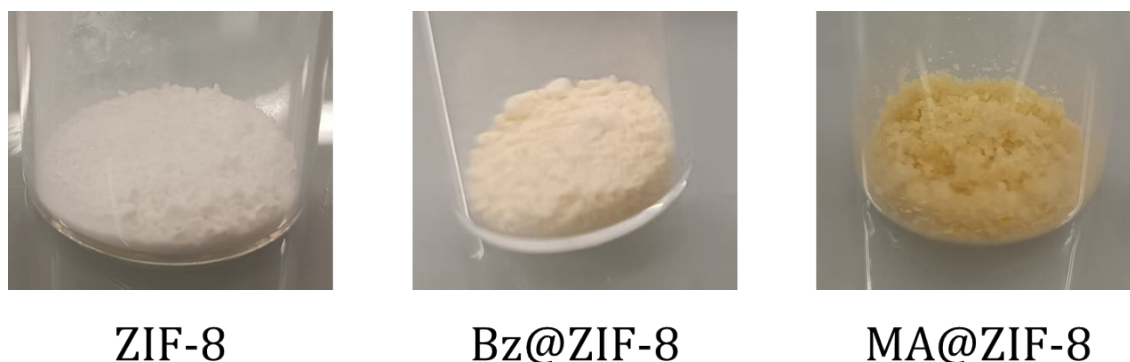

**Figure S4.** Image of the encapsulated materials, compared with pristine ZIF-8.

### Infrared Spectroscopy

**Table S1.** Position and assignment of the principal bands of pristine ZIF-8 and the two active molecules employed in this study.

| Compound            | Band position / $\text{cm}^{-1}$ | Assignment                                           |
|---------------------|----------------------------------|------------------------------------------------------|
| ZIF-8               | 3135 and 2929                    | aromatic and aliphatic $\nu_{\text{as}}(\text{C-H})$ |
|                     | 1583                             | $\nu_{\text{C=N}}$                                   |
|                     | 1460–1309                        | skeletal vibration of the imidazolate ring           |
|                     | 1180 and 1146                    | aromatic $\nu_{\text{C-N}}$                          |
|                     | 995                              | $\delta_{\text{C-N}}$                                |
|                     | 760                              | $\delta_{\text{C-H}}$                                |
| Benzaldehyde        | 420                              | $\nu_{\text{Zn-N}}$                                  |
|                     | 3064                             | aromatic $\nu_{\text{C-H}}$                          |
|                     | 2816 and 2734                    | aldehyde-related $\nu_{\text{C-H}}$                  |
|                     | 1696                             | aldehyde $\nu_{\text{C=O}}$                          |
|                     | 1595 and 1583                    | aromatic $\nu_{\text{C=C}}$                          |
| Methyl anthranilate | 1454                             | aldehyde $\delta_{\text{C-H}}$                       |
|                     | 3479 and 3370                    | $\nu(\text{NH}_2)$                                   |
|                     | 2951                             | $\nu_{\text{C-H}}$                                   |
|                     | 1612, 848 and 798                | $\delta(\text{NH}_2)$                                |
|                     | 1685                             | $\nu_{\text{C=O}}$                                   |
|                     | 1242                             | $\nu_{\text{as}}(\text{CO-O})$                       |
| 1098                | $\nu_{\text{as}}(\text{O-C-C})$  |                                                      |

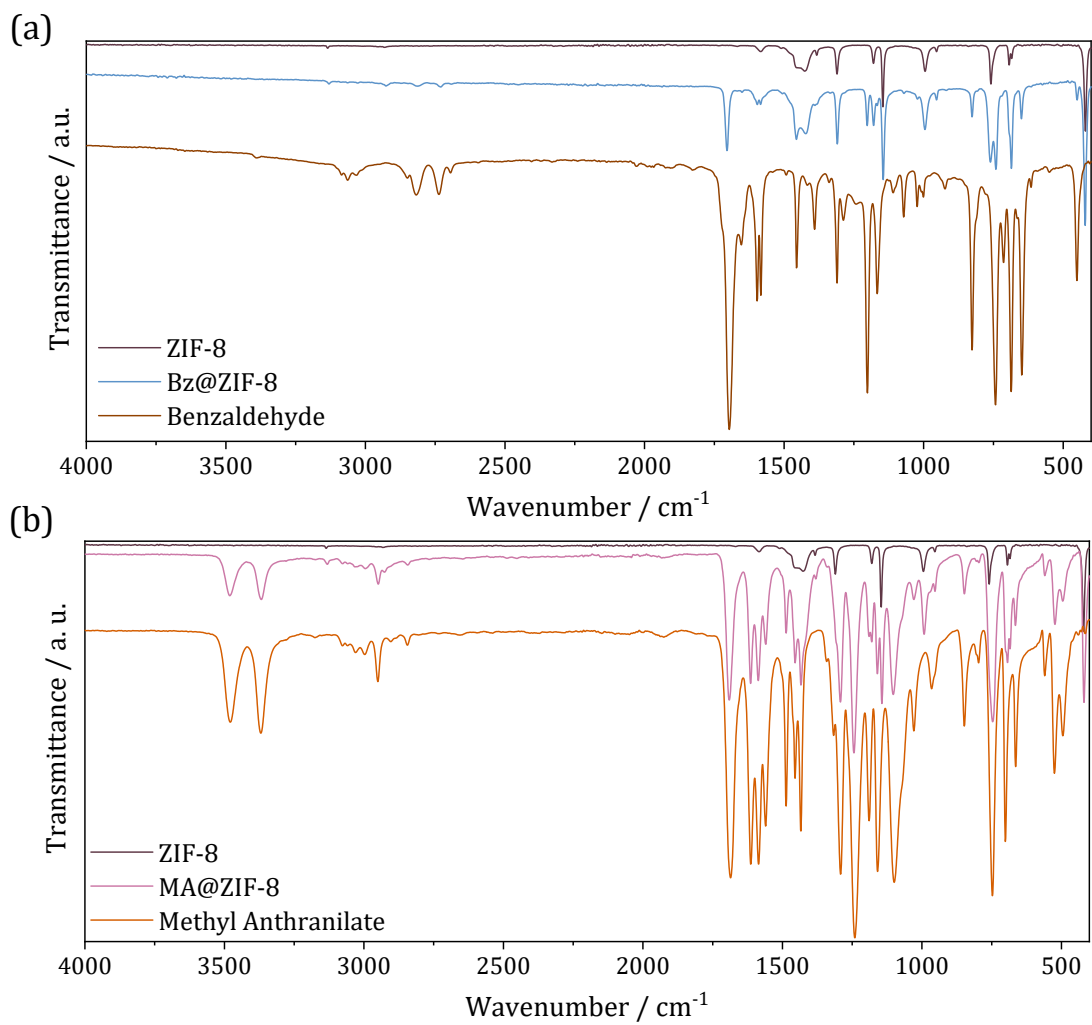

**Figure S5.** (a) FTIR spectra of Bz@ZIF-8 (blue) compared with ZIF-8 (purple) and benzaldehyde (yellow). (b) FTIR spectra MA@ZIF-8 (pink) compared with ZIF-8 (purple) and methyl anthranilate (orange).

## Thermogravimetric analysis

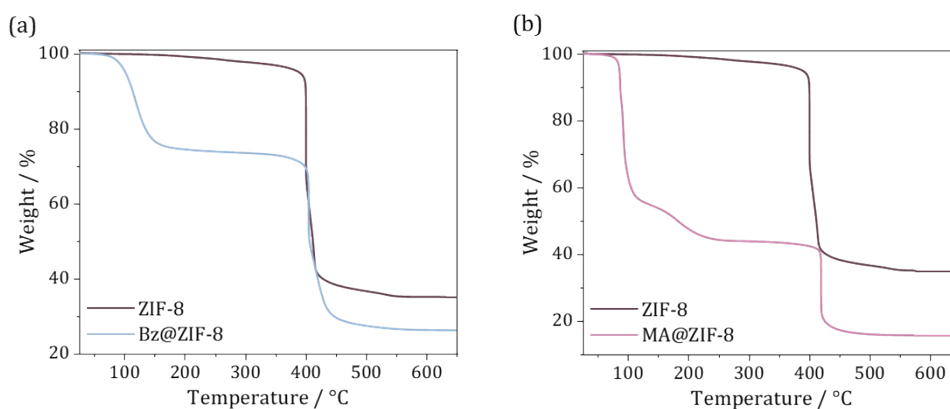

**Figure S6.** Thermogravimetric analysis of the obtained biomolecule@ZIF-8 composites compared with pristine ZIF-8 nanoparticles. To maximize solvent removal while retaining the active molecules, ZIF-8 NPs and Bz@ZIF-8 composite were pre-treated by heating at 100 °C for 3 hours, with an extended 16 hours for MA@ZIF-8 due to its gel nature.

**Table S2.** Summary of the ligand decomposition temperature, inorganic residue value and the estimated molecule loading for each material, as compared to the control empty ZIF-8 and related theoretical value (theo).

|              | Ligand decomp. T / °C | Inorganic residue (D.B.) / % (w/w) | Loading / % (w/w) |
|--------------|-----------------------|------------------------------------|-------------------|
| ZIF-8 (theo) | -                     | 36.0                               | -                 |
| ZIF-8        | 405                   | 36.1                               | -                 |
| Bz@ZIF-8     | 410                   | 28.4                               | 21.3              |
| MA@ZIF-8     | 400                   | 23.9                               | 33.8              |

## N<sub>2</sub> sorption isotherms at 77 K

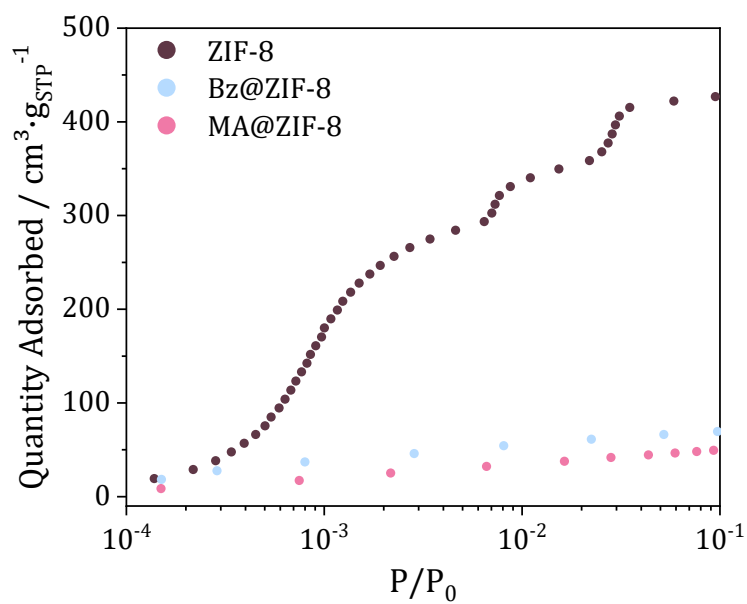

**Figure S7.** Logarithmic representation of N<sub>2</sub> adsorption isotherms at 77 K of Bz@ZIF-8 and MA@ZIF-8, compared with ZIF-8 in the micropore region.

***In vitro* evaluation of antifungal activity**

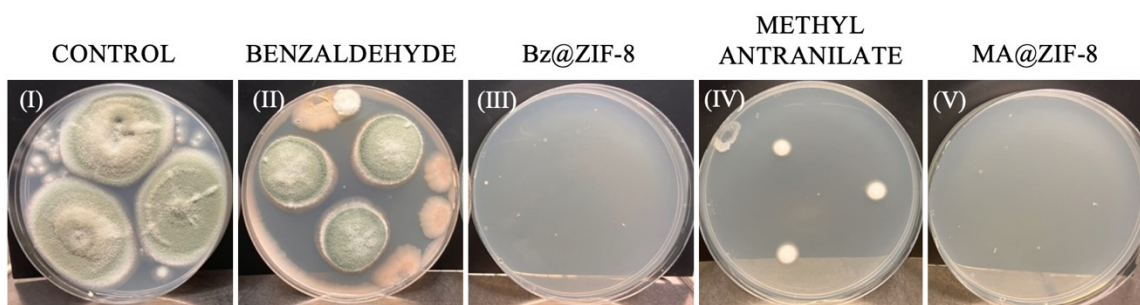

**Figure S8.** (a) Images of the microatmosphere test carried out to determine the activity of Bz@ZIF-8 and MA@ZIF-8 containing films against *Penicilium expansum*: images of the Petri dishes showing 3 droplets of the fungal suspension for control (I), free benzaldehyde (II), Bz@ZIF-8 composite (III), free methyl anthranilate (IV) and MA@ZIF-8 composite (V). The images correspond to 9 days of incubation.



## Bz release kinetics

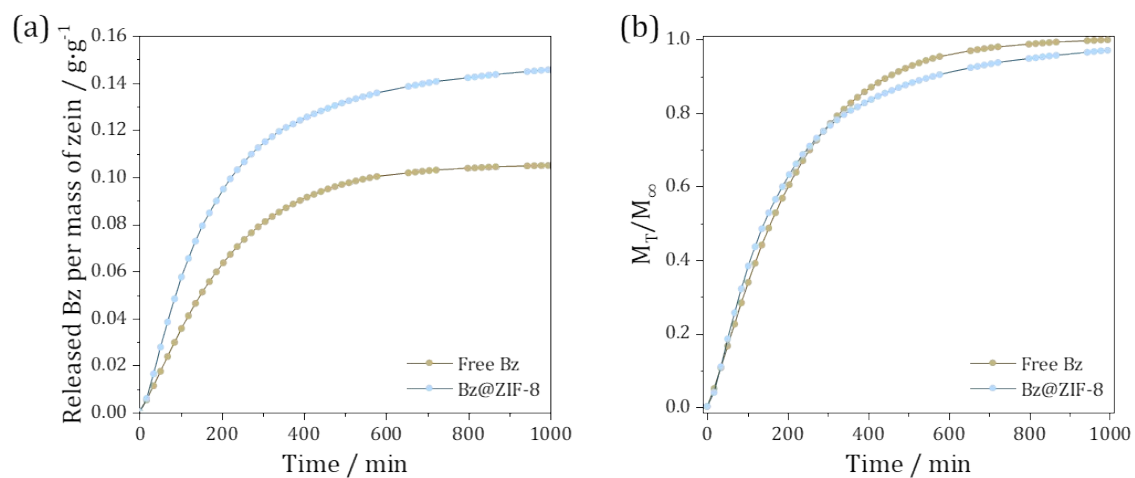

**Figure S9.** (a) Accumulated mass of Bz released over time for the studied films. (b) Ratio of mass release at time “t” vs the mass at infinite time. Lines and symbols in yellow correspond to film with free Bz, blue lines and symbols correspond to films with Bz@ZIF-8.
